# Supplementary material for: Vitamin D receptor activation reduces VCaP xenograft tumor growth and counteracts ERG activity despite induction of TMPRSS2:ERG
Source: PubMed Central journal article supplement (PMC5546493; doi:10.18632/oncotarget.17968), 2017-05-18
Supplement: oncotarget-08-44447-s001.pdf [file oncotarget-08-44447-s001.pdf]

## Vitamin D receptor activation reduces VCaP xenograft tumor growth and counteracts ERG activity despite induction of TMPRSS2:ERG

### Supplementary Materials

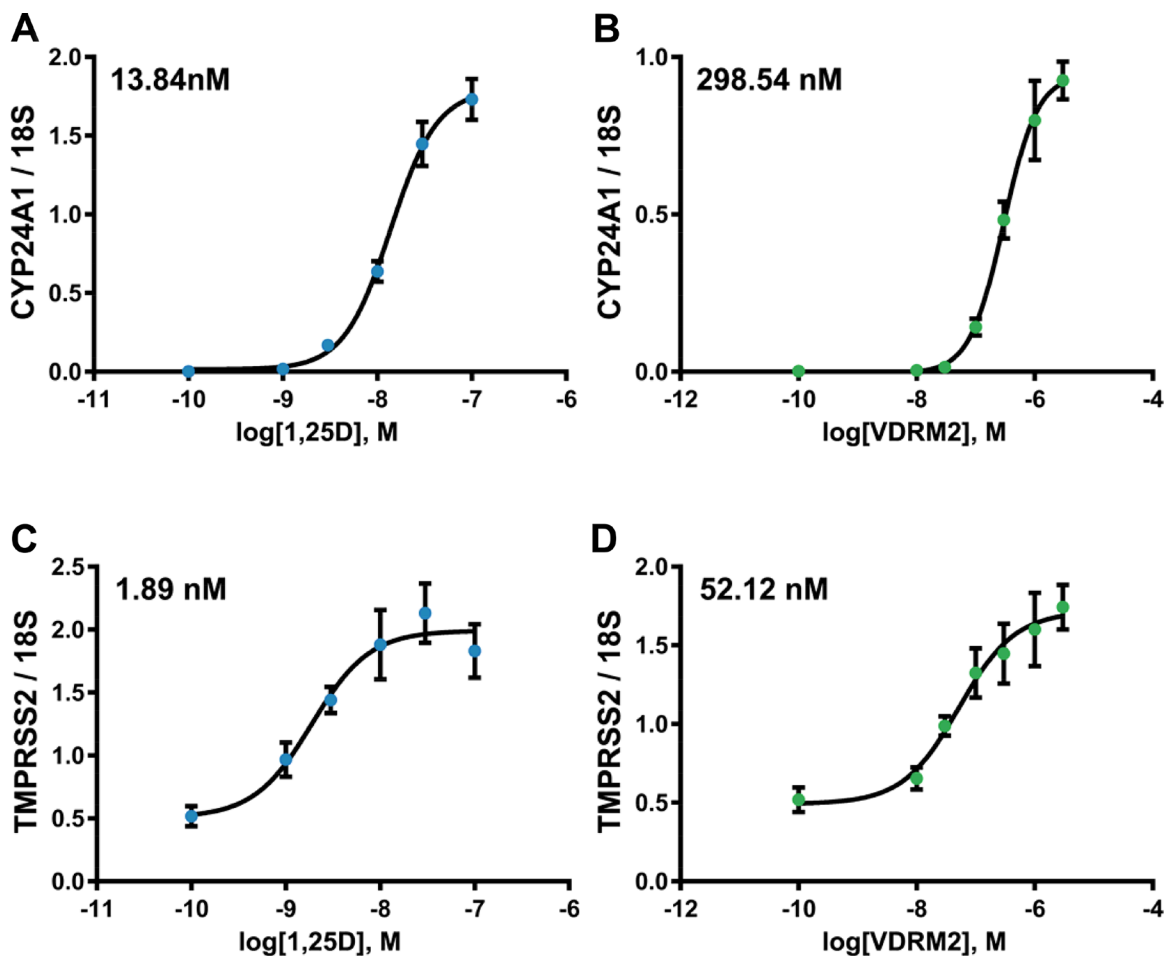

**Supplementary Figure 1: Calculated  $EC_{50}$  values for VDR target genes CYP24A1 and TMPRSS2.** (A) The  $EC_{50}$  value for 1,25D(OH)<sub>2</sub>D<sub>3</sub> (1,25D)-mediated induction of CYP24A1 is 13.84 nM. (B) The  $EC_{50}$  value for VDRM2-mediated induction of CYP24A1 is 298.54 nM. (C) The  $EC_{50}$  value for 1,25D(OH)<sub>2</sub>D<sub>3</sub>-mediated induction of TMPRSS2 is 1.89 nM. (D) The  $EC_{50}$  value for VDRM2-mediated induction of TMPRSS2 is 52.12 nM.

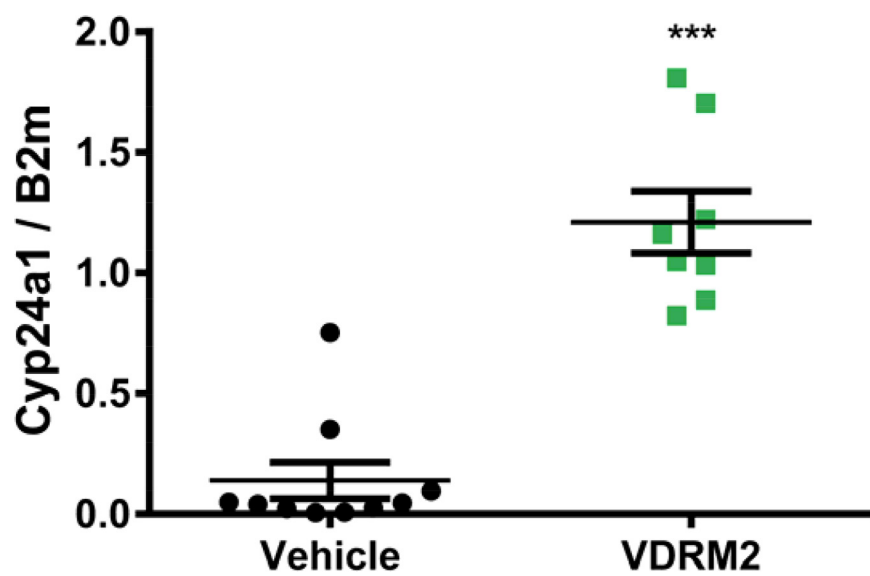

**Supplementary Figure 2: VDRM2 induces Cyp24a1 in mouse kidneys.** Kidneys were harvested from the mice and RNA was purified. VDR target gene Cyp24a1 mRNA was measured by q-PCR and normalized to  $\beta$ -2m.  $n = 10$  vehicle,  $n = 8$  VDRM2. \*\*\* $p < 0.001$ , relative to vehicle control, mean  $\pm$  SEM.

**Supplementary Table 1: The “Unique” 1,25D(OH)<sub>2</sub>D<sub>3</sub> upregulated genes from RNA sequencing**

VCaP “Unique” 1,25D – Upregulated Genes (FC ≥ 1.5, q &lt; 0.25)

| Gene Symbol    | Linear Fold Change<br>1,25D/Vehicle | <i>p</i> -value<br>1,25D/Vehicle | Linear Fold Change<br>VDRM2/Vehicle | <i>p</i> -value<br>VDRM2/Vehicle |
|----------------|-------------------------------------|----------------------------------|-------------------------------------|----------------------------------|
| <b>PYROXD2</b> | 2.75                                | <b>4.200E-03</b>                 | <b>0.73</b>                         | <b>2.139E-01</b>                 |
| SERPINA11      | 1.99                                | 6.900E-03                        | 1.36                                | 1.316E-01                        |
| C1orf85        | 1.77                                | 8.800E-03                        | 1.32                                | 1.710E-02                        |
| CRNKL1         | 1.60                                | 8.300E-03                        | 1.39                                | 1.300E-02                        |
| SH3BGRL3       | 1.58                                | 8.600E-03                        | 1.48                                | 1.300E-03                        |
| AP4S1          | 1.51                                | 7.000E-04                        | 1.40                                | 1.490E-02                        |
| ACVR1          | 1.79                                | 1.500E-03                        | 1.40                                | 4.750E-02                        |
| TESC           | 1.61                                | 6.200E-03                        | 1.47                                | 5.600E-03                        |
| SMOX           | 1.50                                | 5.800E-03                        | 1.47                                | 1.400E-02                        |
| SLC9A1         | 1.71                                | 2.900E-03                        | 1.50                                | 2.400E-03                        |
| HLA-DMB        | 1.60                                | 7.700E-03                        | 1.36                                | 1.250E-02                        |
| DDX58          | 1.61                                | 5.000E-04                        | 1.35                                | 7.370E-02                        |
| RP11-343C2.8   | 1.96                                | 1.410E-02                        | 1.11                                | 6.130E-01                        |
| INPP1          | 1.85                                | 4.900E-03                        | 1.45                                | 1.200E-02                        |
| KLK15          | 1.83                                | 4.400E-03                        | 1.49                                | 3.680E-02                        |
| MBOAT2         | 1.52                                | 8.500E-03                        | 1.36                                | 1.410E-02                        |
| MCCC2          | 1.54                                | 4.400E-03                        | 1.35                                | 3.680E-02                        |
| THSD7A         | 2.09                                | 3.000E-04                        | 1.26                                | 2.255E-01                        |
| RFX6           | 1.53                                | 5.000E-04                        | 1.43                                | 3.510E-02                        |
| NSMAF          | 1.67                                | 4.100E-03                        | 1.32                                | 8.400E-02                        |

VCaP cells were treated for 24 hours with vehicle (EtOH), 10 nM 1,25D(OH)<sub>2</sub>D<sub>3</sub> (1,25D), or 1 μM VDRM2 then RNA was purified. Transcriptomic profiling was assessed using RNA-Seq on an Illumina HiSeq2000. Significance was assessed using ANOVA, followed by the Benjamini-Hochberg method for multiple hypothesis testing correction. Significance was assessed at *q*-value < 0.25. The genes that are “uniquely” upregulated by 1,25D(OH)<sub>2</sub>D<sub>3</sub> compared to expression level in VDRM2-treated cells. Genes regulated in the opposite direction are bolded.

**Supplementary Table 2: The “Unique” VDRM2 upregulated genes from RNA sequencing**

| VCaP “Unique” VDRM2 – Upregulated Genes (FC ≥ 1.5, q < 0.25) |                                     |                                  |                                     |                                  |
|--------------------------------------------------------------|-------------------------------------|----------------------------------|-------------------------------------|----------------------------------|
| Gene Symbol                                                  | Linear Fold Change<br>1,25D/Vehicle | <i>p</i> -value<br>1,25D/Vehicle | Linear Fold Change<br>VDRM2/Vehicle | <i>p</i> -value<br>VDRM2/Vehicle |
| FZD1                                                         | 1.47                                | 8.800E-03                        | 1.59                                | 8.200E-03                        |
| JUNB                                                         | 1.46                                | 1.240E-02                        | 1.56                                | 3.600E-03                        |
| <b>RND3</b>                                                  | <b>0.69</b>                         | <b>6.863E-01</b>                 | <b>5.00</b>                         | <b>2.210E-02</b>                 |
| LACE1                                                        | 1.09                                | 3.742E-01                        | 1.58                                | 6.100E-03                        |
| TCP11L1                                                      | 1.36                                | 3.390E-02                        | 1.63                                | 5.500E-03                        |
| BAMBI                                                        | 1.07                                | 3.300E-03                        | 1.52                                | 1.420E-02                        |
| RP11-411B6.6                                                 | 1.17                                | 8.732E-01                        | 5.56                                | 1.210E-02                        |
| ZBTB16                                                       | 1.33                                | 2.460E-02                        | 1.57                                | 1.300E-02                        |
| TMEM63B                                                      | 1.44                                | 6.700E-03                        | 1.64                                | 2.500E-03                        |
| ZNF673                                                       | 1.45                                | 6.090E-02                        | 1.92                                | 3.600E-03                        |
| CA12                                                         | 1.45                                | 2.600E-03                        | 1.60                                | 1.100E-03                        |
| ZNF765                                                       | 1.45                                | 1.410E-02                        | 1.51                                | 7.700E-03                        |
| OSGIN1                                                       | 1.38                                | 1.400E-02                        | 1.54                                | 1.680E-02                        |
| PREX1                                                        | 1.37                                | 1.710E-02                        | 1.62                                | 1.020E-02                        |
| SLC25A30                                                     | 1.27                                | 8.690E-02                        | 1.77                                | 1.000E-04                        |
| LMLN                                                         | 1.25                                | 1.199E-01                        | 1.60                                | 2.500E-03                        |
| TNFAIP1                                                      | 1.25                                | 8.800E-03                        | 1.53                                | 6.000E-04                        |
| SWAP70                                                       | 1.24                                | 1.136E-01                        | 1.56                                | 3.900E-03                        |

VCaP cells were treated for 24 hours with vehicle (EtOH), 10 nM 1,25D(OH)<sub>2</sub>D<sub>3</sub> (1,25D), or 1 μM VDRM2 then RNA was purified. Transcriptomic profiling was assessed using RNA-Seq on an Illumina HiSeq2000. Significance was assessed using ANOVA, followed by the Benjamini-Hochberg method for multiple hypothesis testing correction. Significance was assessed at *q*-value < 0.25. The genes that are “uniquely” upregulated by VDRM2 compared to expression level in 1,25D(OH)<sub>2</sub>D<sub>3</sub>-treated cells. Genes regulated in the opposite direction are bolded.

**Supplementary Table 3: The “Unique” 1,25D(OH)<sub>2</sub>D<sub>3</sub> downregulated genes from RNA sequencing**

VCaP “Unique” 1,25D – Downregulated Genes (FC ≤ 0.667, q &lt; 0.25)

| Gene Symbol | Linear Fold Change<br>1,25D/Vehicle | p-value<br>1,25D/Vehicle | Linear Fold Change<br>VDRM2/Vehicle | p-value<br>VDRM2/Vehicle |
|-------------|-------------------------------------|--------------------------|-------------------------------------|--------------------------|
| ADAMTS3     | 0.60                                | 1.110E-02                | 0.69                                | 1.980E-02                |
| PANK1       | 0.62                                | 1.300E-03                | 0.69                                | 3.000E-04                |
| DUS2L       | 0.56                                | 1.560E-02                | 0.73                                | 6.400E-03                |
| ZNF239      | 0.64                                | 8.000E-04                | 0.68                                | 1.100E-02                |
| ARHGEF4     | 0.63                                | 7.700E-03                | 0.84                                | 1.557E-01                |
| TRERF1      | 0.65                                | 1.000E-02                | 0.70                                | 1.960E-02                |
| RASL10B     | 0.66                                | 9.000E-04                | 0.76                                | 1.140E-02                |
| NABP1       | 0.55                                | 3.100E-03                | 0.84                                | 4.060E-02                |
| PAX1        | 0.62                                | 1.500E-03                | 0.67                                | 2.680E-02                |
| C19orf44    | 0.66                                | 1.470E-02                | 0.84                                | 8.120E-02                |
| <b>AMT</b>  | <b>0.39</b>                         | <b>2.750E-02</b>         | <b>1.36</b>                         | <b>1.182E-01</b>         |

VCaP cells were treated for 24 hours with vehicle (EtOH), 10 nM 1,25D(OH)<sub>2</sub>D<sub>3</sub> (1,25D), or 1 μM VDRM2 then RNA was purified. Transcriptomic profiling was assessed using RNA-Seq on an Illumina HiSeq2000. Significance was assessed using ANOVA, followed by the Benjamini-Hochberg method for multiple hypothesis testing correction. Significance was assessed at *q*-value < 0.25. The genes that are “uniquely” downregulated by 1,25D(OH)<sub>2</sub>D<sub>3</sub> compared to expression level in VDRM2-treated cells. Genes regulated in the opposite direction are bolded.

**Supplementary Table 4: The “Unique” VDRM2 downregulated genes from RNA sequencing**

| VCaP “Unique” VDRM2 – Downregulated Genes (FC ≤ 0.667, q < 0.25) |                                     |                                  |                                     |                                  |
|------------------------------------------------------------------|-------------------------------------|----------------------------------|-------------------------------------|----------------------------------|
| Gene Symbol                                                      | Linear Fold Change<br>1,25D/Vehicle | <i>p</i> -value<br>1,25D/Vehicle | Linear Fold Change<br>VDRM2/Vehicle | <i>p</i> -value<br>VDRM2/Vehicle |
| DUS3L                                                            | 0.68                                | 9.300E-03                        | 0.67                                | 8.100E-03                        |
| NLE1                                                             | 0.72                                | 1.240E-02                        | 0.66                                | 3.000E-03                        |
| CRYM                                                             | 0.67                                | 2.700E-03                        | 0.52                                | 2.300E-03                        |
| SEZ6                                                             | 0.77                                | 1.300E-02                        | 0.61                                | 1.550E-02                        |
| PHGDH                                                            | 0.72                                | 8.100E-03                        | 0.65                                | 5.700E-03                        |
| <b>C1R</b>                                                       | <b>1.22</b>                         | <b>2.590E-02</b>                 | <b>0.59</b>                         | <b>2.500E-03</b>                 |
| ENHO                                                             | 0.76                                | 2.540E-02                        | 0.41                                | 8.600E-03                        |
| TMEM62                                                           | 0.81                                | 5.400E-03                        | 0.64                                | 8.500E-03                        |
| FAM134B                                                          | 0.70                                | 1.300E-03                        | 0.59                                | 9.000E-04                        |
| POLR2M                                                           | 0.70                                | 8.600E-03                        | 0.62                                | 1.670E-02                        |
| MEX3B                                                            | 0.67                                | 8.800E-03                        | 0.62                                | 5.000E-03                        |
| IMP3                                                             | 0.76                                | 4.500E-02                        | 0.67                                | 5.500E-03                        |
| ATP8B2                                                           | 0.71                                | 9.600E-03                        | 0.64                                | 9.000E-03                        |
| PDK3                                                             | 0.69                                | 1.440E-02                        | 0.65                                | 5.700E-03                        |
| GARS                                                             | 0.72                                | 6.800E-03                        | 0.65                                | 1.260E-02                        |
| HMBS                                                             | 0.69                                | 1.000E-04                        | 0.66                                | 1.970E-02                        |
| LPCAT4                                                           | 0.79                                | 8.000E-04                        | 0.59                                | 1.000E-04                        |
| C17orf90                                                         | 0.80                                | 2.730E-02                        | 0.61                                | 1.480E-02                        |
| C1orf233                                                         | 0.69                                | 6.900E-03                        | 0.59                                | 1.300E-03                        |
| POLR3C                                                           | 0.70                                | 2.100E-03                        | 0.64                                | 0.000E+00                        |
| C3orf78                                                          | 0.91                                | 3.883E-01                        | 0.39                                | 1.580E-02                        |

VCaP cells were treated for 24 hours with vehicle (EtOH), 10 nM 1,25D(OH)<sub>2</sub>D<sub>3</sub> (1,25D), or 1 μM VDRM2 then RNA was purified. Transcriptomic profiling was assessed using RNA-Seq on an Illumina HiSeq2000. Significance was assessed using ANOVA, followed by the Benjamini-Hochberg method for multiple hypothesis testing correction. Significance was assessed at *q*-value < 0.25. The genes that are “uniquely” downregulated by VDRM2 compared to expression level in 1,25D(OH)<sub>2</sub>D<sub>3</sub>-treated cells. Genes regulated in the opposite direction are bolded.

**Supplementary Table 5: The top 30 genes upregulated by 1,25D(OH)<sub>2</sub>D<sub>3</sub>****VCaP Top 30 1,25D Upregulated Genes (FC ≥ 1.5, q < 0.25)**

| <b>Gene Symbol</b> | <b>Linear Fold Change 1,25D/Vehicle</b> | <b>p-value 1,25D/Vehicle</b> |
|--------------------|-----------------------------------------|------------------------------|
| CYP24A1            | 3218.89                                 | 3.024E-04                    |
| SULT1C2            | 53.62                                   | 5.513E-03                    |
| C8orf4             | 20.85                                   | 4.818E-05                    |
| ZNF516             | 19.57                                   | 1.821E-03                    |
| SPARC              | 19.22                                   | 8.640E-04                    |
| F3                 | 14.12                                   | 6.320E-05                    |
| SNTB1              | 12.89                                   | 1.452E-03                    |
| LY96               | 10.24                                   | 4.033E-02                    |
| THBD               | 10.23                                   | 1.090E-03                    |
| MYO1G              | 9.21                                    | 4.741E-03                    |
| NFATC2             | 8.98                                    | 6.062E-04                    |
| TMPRSS2            | 8.94                                    | 1.709E-03                    |
| HSD3B1             | 8.31                                    | 6.866E-03                    |
| SCUBE2             | 7.76                                    | 6.874E-04                    |
| GDF15              | 7.74                                    | 1.328E-03                    |
| AMACR              | 7.01                                    | 5.880E-03                    |
| GOLGA7B            | 5.96                                    | 1.103E-04                    |
| SYTL5              | 5.48                                    | 8.617E-03                    |
| CEBPD              | 5.35                                    | 1.757E-03                    |
| ZNF703             | 5.34                                    | 3.685E-04                    |
| DCLK1              | 5.00                                    | 3.231E-03                    |
| C1orf87            | 4.99                                    | 3.903E-04                    |
| TLR3               | 4.85                                    | 3.652E-05                    |
| ARHGAP31           | 4.45                                    | 9.688E-03                    |
| SLC44A5            | 4.39                                    | 9.947E-05                    |
| TRPV6              | 4.29                                    | 1.697E-03                    |
| PTRF               | 4.25                                    | 1.530E-04                    |
| KANK4              | 3.78                                    | 2.948E-03                    |
| CDH12              | 3.73                                    | 1.600E-03                    |
| DHRS3              | 3.61                                    | 9.320E-04                    |

VCaP cells were treated for 24 hours with vehicle (EtOH) or 10 nM 1,25D(OH)<sub>2</sub>D<sub>3</sub> (1,25D) then RNA was purified. Transcriptomic profiling was assessed using RNA-Seq on an Illumina HiSeq2000. Significance was assessed using ANOVA, followed by the Benjamini-Hochberg method for multiple hypothesis testing correction. Significance was assessed at *q*-value < 0.25. The top 30 1,25D(OH)<sub>2</sub>D<sub>3</sub> upregulated genes sorted by fold change, cutoff 1.5-fold regulation.

**Supplementary Table 6: The top 30 genes downregulated by 1,25D(OH)<sub>2</sub>D<sub>3</sub>****VCaP Top 30 1,25D Downregulated Genes (FC ≤ 0.667, q < 0.25)**

| <b>Gene Symbol</b> | <b>Linear Fold Change 1,25D/Vehicle</b> | <b>p-value 1,25D/Vehicle</b> |
|--------------------|-----------------------------------------|------------------------------|
| NGEF               | 0.24                                    | 1.077E-02                    |
| MEIS1              | 0.26                                    | 4.795E-03                    |
| OPRK1              | 0.33                                    | 2.186E-03                    |
| SERP2              | 0.33                                    | 7.632E-03                    |
| MUCL1              | 0.35                                    | 1.527E-02                    |
| RORB               | 0.35                                    | 1.046E-02                    |
| GLYATL1            | 0.38                                    | 2.312E-02                    |
| AMT                | 0.39                                    | 2.749E-02                    |
| MALL               | 0.42                                    | 1.290E-04                    |
| NR4A2              | 0.43                                    | 1.444E-03                    |
| CSRP2              | 0.44                                    | 7.706E-03                    |
| STON2              | 0.44                                    | 1.947E-03                    |
| FAM84A             | 0.46                                    | 1.834E-02                    |
| LRRC3              | 0.46                                    | 7.189E-03                    |
| HMGCS2             | 0.46                                    | 4.602E-03                    |
| DDN                | 0.47                                    | 1.120E-04                    |
| WNT2               | 0.49                                    | 2.747E-03                    |
| MIR3654            | 0.49                                    | 3.139E-03                    |
| PEG3               | 0.49                                    | 1.501E-02                    |
| SERPINI1           | 0.51                                    | 6.058E-03                    |
| TSHZ1              | 0.53                                    | 5.144E-03                    |
| KLF5               | 0.53                                    | 1.050E-02                    |
| PARP8              | 0.54                                    | 8.781E-03                    |
| PLCE1              | 0.54                                    | 4.109E-02                    |
| PEG10              | 0.55                                    | 1.600E-03                    |
| TLL2               | 0.55                                    | 8.179E-03                    |
| NABP1              | 0.55                                    | 3.135E-03                    |
| DUS2L              | 0.56                                    | 1.555E-02                    |
| ANXA6              | 0.56                                    | 2.082E-03                    |
| SOX13              | 0.57                                    | 1.207E-03                    |

VCaP cells were treated for 24 hours with vehicle (EtOH) or 10 nM 1,25D(OH)<sub>2</sub>D<sub>3</sub> (1,25D) then RNA was purified. Transcriptomic profiling was assessed using RNA-Seq on an Illumina HiSeq2000. Significance was assessed using ANOVA, followed by the Benjamini-Hochberg method for multiple hypothesis testing correction. Significance was assessed at *q*-value < 0.25. The top 30 1,25D(OH)<sub>2</sub>D<sub>3</sub> downregulated genes sorted by fold change, cutoff 1.5-fold regulation.



**Supplementary Table 7: The top 30 genes upregulated by VDRM2****VCaP Top 30 VDRM2 Upregulated Genes (FC  $\geq$  1.5,  $q < 0.25$ )**

| <b>Gene Symbol</b> | <b>Linear Fold Change VDRM2 / Vehicle</b> | <b><i>p</i>-value VDRM2 / Vehicle</b> |
|--------------------|-------------------------------------------|---------------------------------------|
| CYP24A1            | 7509.24                                   | 6.927E-04                             |
| SULT1C2            | 61.99                                     | 1.317E-02                             |
| ZNF516             | 25.08                                     | 8.851E-05                             |
| C8orf4             | 21.26                                     | 7.365E-04                             |
| SPARC              | 18.69                                     | 1.063E-03                             |
| LY96               | 17.28                                     | 5.819E-03                             |
| F3                 | 16.40                                     | 5.355E-05                             |
| SNTB1              | 15.16                                     | 2.563E-03                             |
| TMPRSS2            | 10.84                                     | 2.045E-03                             |
| NFATC2             | 10.08                                     | 4.791E-05                             |
| GDF15              | 8.94                                      | 3.225E-03                             |
| MYO1G              | 8.76                                      | 1.532E-03                             |
| THBD               | 8.24                                      | 1.086E-03                             |
| SCUBE2             | 7.98                                      | 2.712E-04                             |
| AMACR              | 7.45                                      | 2.447E-03                             |
| HSD3B1             | 7.37                                      | 2.366E-03                             |
| LOXL2              | 6.68                                      | 1.129E-03                             |
| GOLGA7B            | 6.67                                      | 2.729E-04                             |
| ZNF703             | 6.23                                      | 6.212E-03                             |
| SYTL5              | 5.87                                      | 9.369E-03                             |
| RP11-411B6.6       | 5.56                                      | 1.214E-02                             |
| TRPV6              | 5.55                                      | 4.881E-03                             |
| DCLK1              | 5.07                                      | 7.137E-04                             |
| CEBPD              | 5.05                                      | 6.948E-04                             |
| RND3               | 5.00                                      | 2.211E-02                             |
| PTRF               | 4.92                                      | 8.637E-04                             |
| FAM131B            | 4.61                                      | 3.052E-03                             |
| SLC44A5            | 4.58                                      | 6.540E-03                             |
| C1orf87            | 4.58                                      | 2.650E-02                             |
| TLR3               | 4.55                                      | 8.849E-05                             |

VCaP cells were treated for 24 hours with vehicle (EtOH) or 1  $\mu$ M VDRM2 then RNA was purified. Transcriptomic profiling was assessed using RNA-Seq on an Illumina HiSeq2000. Significance was assessed using ANOVA, followed by the Benjamini-Hochberg method for multiple hypothesis testing correction. Significance was assessed at  $q$ -value  $< 0.25$ . The top 30 VDRM2 upregulated genes sorted by fold change, cutoff 1.5-fold regulation.

**Supplementary Table 8: The top 30 genes downregulated by VDRM2****VCaP Top 30 VDRM2 Downregulated Genes (FC  $\leq$  0.667,  $q < 0.25$ )**

| Gene Symbol | Linear Fold Change VDRM2/Vehicle | <i>p</i> -value VDRM2/Vehicle |
|-------------|----------------------------------|-------------------------------|
| OPRK1       | 0.27                             | 2.788E-03                     |
| MALL        | 0.35                             | 1.827E-04                     |
| NR4A2       | 0.35                             | 9.844E-03                     |
| GLYATL1     | 0.36                             | 2.138E-02                     |
| MUCL1       | 0.36                             | 9.873E-03                     |
| PARP8       | 0.37                             | 1.533E-05                     |
| C3orf78     | 0.39                             | 1.582E-02                     |
| RORB        | 0.39                             | 1.565E-02                     |
| ENHO        | 0.41                             | 8.597E-03                     |
| CSRP2       | 0.41                             | 7.821E-03                     |
| FAM84A      | 0.42                             | 7.019E-03                     |
| PLCE1       | 0.45                             | 2.052E-02                     |
| MEIS1       | 0.45                             | 1.030E-02                     |
| NGEF        | 0.46                             | 4.499E-02                     |
| TSHZ1       | 0.46                             | 5.435E-04                     |
| ADM         | 0.47                             | 7.204E-03                     |
| WNT2        | 0.47                             | 1.813E-03                     |
| FABP5       | 0.49                             | 4.780E-03                     |
| SERP2       | 0.49                             | 3.070E-02                     |
| HMGCS2      | 0.51                             | 2.288E-03                     |
| CRYM        | 0.52                             | 2.252E-03                     |
| BEND3       | 0.52                             | 4.717E-03                     |
| SERPINI1    | 0.52                             | 7.647E-03                     |
| DDN         | 0.53                             | 2.509E-03                     |
| TLE1        | 0.53                             | 7.263E-03                     |
| PEG10       | 0.55                             | 5.005E-04                     |
| LIN7A       | 0.55                             | 1.142E-03                     |
| PEG3        | 0.56                             | 3.360E-02                     |
| SOX13       | 0.57                             | 1.919E-03                     |
| ANXA6       | 0.59                             | 2.425E-04                     |

VCaP cells were treated for 24 hours with vehicle (EtOH) or 1  $\mu$ M VDRM2 RNA was purified. Transcriptomic profiling was assessed using RNA-Seq on an Illumina HiSeq2000. Significance was assessed using ANOVA, followed by the Benjamini-Hochberg method for multiple hypothesis testing correction. Significance was assessed at  $q$ -value  $< 0.25$ . The top 30 VDRM2 downregulated genes sorted by fold change, cutoff 1.5-fold regulation.

**Supplementary Table 9: Normalized enrichment scores and *q*-values from Gene Set Enrichment Analysis (GSEA) of the top 5 Hallmark gene set collection pathways regulated by 1,25D(OH)<sub>2</sub>D<sub>3</sub> and VDRM2**

| Gene Set Enrichment Analysis Top 5 Hallmark Gene Set Pathways |       |                           |       |                           |
|---------------------------------------------------------------|-------|---------------------------|-------|---------------------------|
| HALLMARK Gene Set                                             | 1,25D |                           | VDRM2 |                           |
|                                                               | NES   | -Log10 ( <i>q</i> -value) | NES   | -Log10 ( <i>q</i> -value) |
| MYC TARGETS V1                                                | -4.87 | > 4.0                     | -5.12 | > 4.0                     |
| E2F TARGETS                                                   | -4.63 | > 4.0                     | -4.50 | > 4.0                     |
| MYC TARGETS V2                                                | -4.16 | > 4.0                     | -3.96 | > 4.0                     |
| G2M CHECKPOINT                                                | -3.51 | > 4.0                     | -3.11 | > 4.0                     |
| ANDROGEN RESPONSE                                             | 3.03  | 4.10                      | 3.07  | 3.14                      |

NES: Normalized enrichment score. The top 5 pathways significantly regulated via GSEA using the Hallmark gene set collection comparing 1,25D(OH)<sub>2</sub>D<sub>3</sub> (1,25D) and VDRM2-treated VCaP cells. NES: normalized enrichment score. *q*-value: False discovery rate (FDR) adjusted *p*-value.

**Supplementary Table 10: Normalized enrichment scores and *q*-values from Gene Set Enrichment Analysis (GSEA) of the top 10 Hallmark gene set collection pathways regulated by ERG, 1,25D(OH)<sub>2</sub>D<sub>3</sub>, and VDRM2**

| Gene Set Enrichment Analysis Top 10 Hallmark Gene Set Pathways |           |                           |       |                           |       |                           |
|----------------------------------------------------------------|-----------|---------------------------|-------|---------------------------|-------|---------------------------|
| HALLMARK Gene Set                                              | siERG IVB |                           | 1,25D |                           | VDRM2 |                           |
|                                                                | NES       | -Log10 ( <i>q</i> -value) | NES   | -Log10 ( <i>q</i> -value) | NES   | -Log10 ( <i>q</i> -value) |
| MYC TARGETS V1                                                 | 3.07      | 2.82                      | -4.87 | > 4.0                     | -5.12 | > 4.0                     |
| MYC TARGETS V2                                                 | 2.68      | 2.44                      | -4.16 | > 4.0                     | -3.96 | > 4.0                     |
| E2F TARGETS                                                    | 2.55      | 2.18                      | -4.63 | > 4.0                     | -4.50 | > 4.0                     |
| G2M CHECKPOINT                                                 | 2.35      | 1.69                      | -3.51 | > 4.0                     | -3.11 | > 4.0                     |
| INF GAMMA RESPONSE                                             | -2.64     | 2.01                      | -     | N.S.                      | -     | N.S.                      |
| INF ALPHA RESPONSE                                             | -2.48     | 1.91                      | -     | N.S.                      | -     | N.S.                      |
| INFLAMMATORY RESPONSE                                          | -1.97     | 0.99                      | 2.19  | 1.65                      | 1.97  | 1.07                      |
| HEME METABOLISM                                                | -3.09     | 2.90                      | 1.67  | 0.81                      | 1.62  | 0.73                      |
| PROTEIN SECRETION                                              | -2.26     | 1.46                      | 2.82  | 3.40                      | 2.83  | 2.56                      |
| KRAS SIGNALING UP                                              | -2.19     | 1.36                      | 2.06  | 1.39                      | 1.81  | 0.87                      |

NES: Normalized enrichment score. The top 10 pathways significantly regulated via GSEA using the Hallmark gene set collection comparing siERG IVB, 1,25D(OH)<sub>2</sub>D<sub>3</sub> (1,25D) and VDRM2-treated VCaP cells. NES: normalized enrichment score. *q*-value: False discovery rate (FDR) adjusted *p*-value.
